# Supplementary material
Source: PubMed Central journal article supplement (PMC7660526)
Supplement: NIHMS1641923-supplement-Data_Supplement.pdf [file NIHMS1641923-supplement-Data_Supplement.pdf]

## SUPPLEMENTAL MATERIAL

**Table S1. Definition of Affected Arterial Bed**

|                              | CAD                                                                                                                                                                                                                                                                                                                                                                                          | PAD                                                                                                                                                                                                                                                                                                                                               | CVD                                                                                                                                                                                                                                                                                                                       |
|------------------------------|----------------------------------------------------------------------------------------------------------------------------------------------------------------------------------------------------------------------------------------------------------------------------------------------------------------------------------------------------------------------------------------------|---------------------------------------------------------------------------------------------------------------------------------------------------------------------------------------------------------------------------------------------------------------------------------------------------------------------------------------------------|---------------------------------------------------------------------------------------------------------------------------------------------------------------------------------------------------------------------------------------------------------------------------------------------------------------------------|
| CRUSADE <sup>1</sup>         | <ul style="list-style-type: none"> <li>Entire population presumed to have CAD</li> </ul>                                                                                                                                                                                                                                                                                                     | <ul style="list-style-type: none"> <li>Amputation secondary to ischemia</li> <li>Current claudication</li> <li>Documentation of aortic aneurysm</li> <li>Lower extremity revascularization, such as vascular reconstruction, surgical bypass, percutaneous intervention)</li> <li>Positive non-invasive study, such as ABI &lt; 0.8</li> </ul>    | <ul style="list-style-type: none"> <li>Prior stroke</li> </ul>                                                                                                                                                                                                                                                            |
| REACH <sup>2</sup>           | <ul style="list-style-type: none"> <li>CABG</li> <li>MI</li> <li>PCI</li> <li>Stable angina</li> <li>Unstable angina</li> </ul>                                                                                                                                                                                                                                                              | <ul style="list-style-type: none"> <li>Claudication with prior intervention, such as amputation, angioplasty, atherectomy, peripheral bypass, stenting, or other vascular interventions</li> <li>Current claudication + ABI &lt; 0.9</li> </ul>                                                                                                   | <ul style="list-style-type: none"> <li>Neurologist or hospital report of diagnosis of ischemic stroke or TIA</li> </ul>                                                                                                                                                                                                   |
| CAPRIE <sup>3</sup>          | <p>MI</p> <ul style="list-style-type: none"> <li>≤35 days prior to randomization <i>and</i></li> <li>Two of the following: <ul style="list-style-type: none"> <li>≥20 min ischemic chest pain</li> <li>Elevation CK-MB, LDH, or AST 2x upper limits of normal</li> <li>New Q waves in ≥2 adjacent ECG leads</li> <li>New dominant R wave in V1 (R ≥1 mm &gt; S in V1)</li> </ul> </li> </ul> | <ul style="list-style-type: none"> <li>Intermittent claudication of presumed atherosclerotic origin <i>and</i></li> <li>ABI ≤0.85 (two assessments on separate days) <i>or</i></li> <li>Intermittent claudication with prior leg amputation, reconstructive surgery, or angioplasty with no persisting complications from intervention</li> </ul> | <ul style="list-style-type: none"> <li>Focal neurologic deficit secondary of atherothrombotic origin Onset ≥1 week and ≤6 months before randomization <i>and</i></li> <li>Neurologic signs persisting ≥1 week from onset of stroke <i>and</i></li> <li>CT or MRI ruling out hemorrhage or non-relevant disease</li> </ul> |
| TRA2°P-TIMI 50 <sup>4</sup>  | <ul style="list-style-type: none"> <li>History of spontaneous MI (excludes periprocedural or secondary MI)</li> </ul>                                                                                                                                                                                                                                                                        | <ul style="list-style-type: none"> <li>Intermittent claudication and resting ABI &lt;0.85</li> <li>Prior amputation, peripheral bypass or angioplasty of extremities secondary to ischemia</li> </ul>                                                                                                                                             | <ul style="list-style-type: none"> <li>Prior ischemic stroke</li> <li>Excludes hemorrhagic stroke</li> </ul>                                                                                                                                                                                                              |
| PEGASUS-TIMI 54 <sup>5</sup> | <ul style="list-style-type: none"> <li>Entire population presumed to have CAD</li> </ul>                                                                                                                                                                                                                                                                                                     | <ul style="list-style-type: none"> <li>ABI ≤0.90</li> <li>Prior peripheral revascularization</li> <li>Prior claudication</li> </ul>                                                                                                                                                                                                               | <ul style="list-style-type: none"> <li>Prior ischemic stroke</li> </ul>                                                                                                                                                                                                                                                   |
| EUCLID <sup>6, 7</sup>       | <ul style="list-style-type: none"> <li>Prior MI, PCI, or CABG</li> </ul>                                                                                                                                                                                                                                                                                                                     | <ul style="list-style-type: none"> <li>ABI ≤0.80 <ul style="list-style-type: none"> <li>Confirmation ABI of ≤0.85 required at randomization</li> </ul> </li> <li>If ABI was ≥1.40, a TBI cutoff of ≤0.60 was implemented</li> </ul>                                                                                                               | <ul style="list-style-type: none"> <li>Prior stroke or TIA, carotid stenosis, or carotid revascularization</li> </ul>                                                                                                                                                                                                     |

|                            |                                                                                                                                                                                                                                                                                                                                                                                                       |                                                                                                                                                                                                                                                                                                                                                                                                                                                                                                                                                                           |                                                                                                                                                                                                         |
|----------------------------|-------------------------------------------------------------------------------------------------------------------------------------------------------------------------------------------------------------------------------------------------------------------------------------------------------------------------------------------------------------------------------------------------------|---------------------------------------------------------------------------------------------------------------------------------------------------------------------------------------------------------------------------------------------------------------------------------------------------------------------------------------------------------------------------------------------------------------------------------------------------------------------------------------------------------------------------------------------------------------------------|---------------------------------------------------------------------------------------------------------------------------------------------------------------------------------------------------------|
|                            |                                                                                                                                                                                                                                                                                                                                                                                                       | <ul style="list-style-type: none"> <li>○ Confirmation TBI of <math>\leq 0.65</math> required at randomization</li> <li>• Lower extremity revascularization &gt;30 days prior to randomization</li> </ul>                                                                                                                                                                                                                                                                                                                                                                  |                                                                                                                                                                                                         |
| SAVOR-TIMI 53 <sup>8</sup> | <ul style="list-style-type: none"> <li>• Prior MI that lead to hospitalization with final diagnosis of the following <ul style="list-style-type: none"> <li>○ MI</li> <li>○ PCI</li> <li>○ CABG or</li> </ul> </li> <li>• Objective evidence of CAD (<math>\geq 50\%</math> stenosis) in <math>\geq 2</math> arteries</li> </ul>                                                                      | <ul style="list-style-type: none"> <li>• Intermittent claudication and ABI <math>&lt; 0.90</math> obtained in the previous 12 months</li> <li>• Prior peripheral revascularization or amputation of lower extremities at any level due to arterial obstructive disease (excludes amputations secondary infection and/or peripheral neuropathy)</li> </ul>                                                                                                                                                                                                                 | <ul style="list-style-type: none"> <li>• Prior acute focal neurologic deficit &gt;24 hours secondary to cerebral lesion of vascular origin. (excludes cardio-embolic events)</li> </ul>                 |
| LEADER <sup>9</sup>        | <ul style="list-style-type: none"> <li>• Prior MI, PCI, or CABG</li> <li>• <math>\geq 50\%</math> coronary artery stenosis</li> <li>• Angina pectoris</li> <li>• Asymptomatic ischemia</li> </ul>                                                                                                                                                                                                     | <ul style="list-style-type: none"> <li>• <math>\geq 50\%</math> peripheral artery stenosis</li> </ul>                                                                                                                                                                                                                                                                                                                                                                                                                                                                     | <ul style="list-style-type: none"> <li>• Stroke</li> <li>• TIA</li> <li>• <math>\geq 50\%</math> intracranial or carotid artery stenosis</li> </ul>                                                     |
| IMPROVE-IT <sup>10</sup>   | <ul style="list-style-type: none"> <li>• Entire population presumed to have CAD</li> </ul>                                                                                                                                                                                                                                                                                                            | <ul style="list-style-type: none"> <li>• Claudication</li> <li>• Amputation</li> <li>• Vascular intervention of extremities</li> <li>• ABI <math>&lt; 0.80</math></li> <li>• Imaging evidence of <math>\geq 50\%</math> stenosis in extra coronary arterial bed</li> </ul>                                                                                                                                                                                                                                                                                                | <ul style="list-style-type: none"> <li>• Prior stroke or TIA</li> </ul>                                                                                                                                 |
| FOURIER <sup>11, 12</sup>  | <ul style="list-style-type: none"> <li>• Prior MI</li> </ul>                                                                                                                                                                                                                                                                                                                                          | <ul style="list-style-type: none"> <li>• Intermittent claudication with ABI <math>&lt; 0.85</math></li> <li>• Peripheral vascular revascularization procedure</li> <li>• Amputation due atherosclerotic disease</li> </ul>                                                                                                                                                                                                                                                                                                                                                | <ul style="list-style-type: none"> <li>• Prior stroke</li> </ul>                                                                                                                                        |
| COMPASS <sup>13, 14</sup>  | <ul style="list-style-type: none"> <li>• Previous MI</li> <li>• Stable angina or unstable angina with multi-vessel CAD (<math>&gt; 50\%</math> stenosis in <math>\geq 2</math> major coronary arteries, or positive stress test</li> <li>• Multi-vessel PCI</li> <li>• Multi-vessel CABG within 1 week or at least 4 years ago or with recurrent angina or ischemia any time after surgery</li> </ul> | <ul style="list-style-type: none"> <li>• Previous aorto-femoral bypass surgery, limb bypass surgery or percutaneous transluminal angioplasty of iliac or infrainguinal arteries</li> <li>• Previous limb or foot amputation for arterial vascular disease</li> <li>• Intermittent claudication with ABI <math>\leq 0.90</math> or significant peripheral artery stenosis (<math>&gt; 50\%</math>) documented by angiography or non-invasive testing by duplex ultrasound</li> <li>• Asymptomatic (no ipsilateral stroke or TIA within 6 months) carotid artery</li> </ul> | <ul style="list-style-type: none"> <li>• Not formally defined, but non-lacunar stroke <math>\geq 1</math> month prior to randomization was listed as an additional risk factor for inclusion</li> </ul> |

|  |  |                                                                |  |
|--|--|----------------------------------------------------------------|--|
|  |  | stenosis >50% as diagnosed by duplex ultrasound or angiography |  |
|--|--|----------------------------------------------------------------|--|

ABI = ankle brachial index; AST = aspartate aminotransferase; CAD = coronary artery disease; CABG = coronary artery bypass graft; CAPRIE = Clopidogrel vs. Aspirin in Patients at Risk of Ischemic Events; CK = creatine kinase; COMPASS = Cardiovascular Outcomes for People Using Anticoagulation Strategies; CRUSADE = Can Rapid Risk Stratification of Unstable Angina Patients Suppress Adverse Outcomes with Early Implementation of the ACC/AHA Guidelines; CT = computed tomography; CVD = cerebral vascular disease; ECG = electrocardiogram; EUCLID = Effects of Ticagrelor and Clopidogrel in Patients with Peripheral Artery Disease; FOURIER = Further Cardiovascular Outcomes Research with PCSK9 Inhibition in Subjects with Elevated Risk; IMPROVE-IT = Improved Reduction of Outcomes: Vytorin Efficacy International Trial; LDH = lactate dehydrogenase; MI = myocardial infarction; LEADER = Liraglutide Effect and Action in Diabetes: Evaluation of Cardiovascular Results; MRI = magnetic resonance imaging; PAD = peripheral artery disease; PCI = percutaneous coronary artery intervention; PEGASUS-TIMI 54 = Patients With Prior Heart Attack Using Ticagrelor Compared to Placebo on a Background of Aspirin; REACH = Reduction of Atherothrombosis for Continued Health; SAVOR-TIMI 53 = Saxagliptin Assessment of Vascular Outcomes Recorded in Patients with Diabetes Mellitus – TIMI 53; TBI = toe-brachial index; TIA = transient ischemia attack; TRA2°P-TIMI 50 = Trial to Assess the Effects of Vorapaxar in Preventing Heart Attack and Stroke in Patients With Atherosclerosis – TIMI 50; UA = unstable angina

## Supplemental References

1. Bhatt DL, Eagle KA, Ohman EM, Hirsch AT, Goto S, Mahoney EM, Wilson PW, Alberts MJ, D'Agostino R, Liao CS, Mas JL, et al. Comparative determinants of 4-year cardiovascular event rates in stable outpatients at risk of or with atherothrombosis. *JAMA*. 2010; 304:1350-1357.
2. Bhatt DL, Peterson ED, Harrington RA, Ou FS, Cannon CP, Gibson CM, Kleiman NS, Brindis RG, Peacock WF, Brener SJ, et al. Prior polyvascular disease: risk factor for adverse ischaemic outcomes in acute coronary syndromes. *Eur Heart J*. 2009; 30:1195-1202.
3. Hirsh J, Bhatt DL. Comparative benefits of clopidogrel and aspirin in high-risk patient populations: lessons from the CAPRIE and CURE studies. *Arch Intern Med*. 2004; 164:2106-2110
4. Bonaca MP, Creager MA, Olin J, Scirica BM, Bohula EA, Murphy SA, Braunwal E, Morrow DA. Vorapaxar reduces peripheral revascularization regardless of number of diseased territories: insights from the TRA2°P-TIMI 50 trial. American College of Cardiology Scientific Sessions. 2013.
5. Bonaca MP, Bhatt DL, Storey RF, Steg PG, Cohen M, Kuder J, Goodrich E, Nicolau JC, Parkhomenko A, Lopez-Sendon J, et al. Ticagrelor for prevention of ischemic events after myocardial infarction in patients with peripheral artery disease. *J Am Coll Cardiol*. 2016; 67:2719-2728.
6. Berger JS, Abramson BL, Lopes RD, Heizer G, Rockhold FW, Baumgartner I, Fowkes FGR, Held P, Katona BG, Norgren L, et al. Ticagrelor versus clopidogrel in patients with symptomatic peripheral artery disease and prior coronary artery disease: Insights from the EUCLID trial. *Vasc Med*. 2018; 6:523-530.
7. Gutierrez JA, Mulder H, Jones WS, Rockhold FW, Baumgartner I, Berger JS, Blomster JI, Fowkes GR, Held P, Katona BG, et al. Polyvascular disease and risk of major adverse cardiovascular events in peripheral artery disease: A secondary analysis of the EUCLID trial. *JAMA Netw Open*. 2018;1:e185239.
8. Gutierrez JA, Scirica BM, Bonaca MP, Steg PG, Mosenzon O, Hirshberg B, Im K, Raz I, Braunwald E, Bhatt DL. Prevalence and outcomes of polyvascular (coronary, peripheral, or cerebrovascular) disease in patients with diabetes mellitus (From the SAVOR-TIMI 53 Trial). *Am J Cardiol*. 2019; 123:145-152.
9. Verma S, Bhatt DL, Bain SC, Buse JB, Mann JFE, Marso SP, Nauck MA, Poulter NR, Pratley RE, Zinman B, et al. Effect of liraglutide on cardiovascular events in patients with type 2 diabetes mellitus and polyvascular disease: results of the LEADER trial. *Circulation*. 2018; 137:2179-2183.
10. Bonaca MP, Gutierrez JA, Cannon C, Giugliano R, Blazing M, Park JG, White J, Tershakovec A, Braunwald E. Polyvascular disease, type 2 diabetes, and long-term vascular risk: a secondary analysis of the IMPROVE-IT trial. *Lancet Diabetes Endocrinol*. 2018; 6:934-943.
11. Sabatine MS, Giugliano RP, Keech AC, Honarpour N, Wiviott SD, Murphy SA, Kuder JF, Wang H, Liu T, Wasserman SM, et al. Evolocumab and clinical outcomes in patients with cardiovascular Disease. *N Engl J Med*. 2017; 376:1713-1722.
12. Bonaca MP, Nault P, Giugliano RP, Keech AC, Pineda AL, Kanevsky E, Kuder J, Murphy SA, Jukema JW, Lewis BS, et al. Low-density lipoprotein cholesterol lowering with evolocumab and

outcomes in patients with peripheral artery disease: insights from the FOURIER trial. *Circulation*. 2018; 137:338-350.

13. Anand SS, Bosch J, Eikelboom JW, Connolly SJ, Diaz R, Widimsky P, Aboyans V, Alings M, Kakkar AK, Keltai K, et al. Rivaroxaban with or without aspirin in patients with stable peripheral or carotid artery disease: an international, randomised, double-blind, placebo-controlled trial. *Lancet*. 2018; 391:219-229.

14. Eikelboom JW, Connolly SJ, Bosch J, Dagenais GR, Hart RG, Shestakovska O, Diaz R, Alings M, Lonn EM, Anand SS, et al. Rivaroxaban with or without aspirin in stable cardiovascular disease. *N Engl J Med*. 2017; 377:1319-1330.
